# Supplementary material for: Telencephalon transcriptome analysis of chronically stressed adult zebrafish
Source: PubMed Central journal article supplement (PMC6361922; doi:10.1038/s41598-018-37761-7), 2019-02-04
Supplement: 41598_2018_37761_MOESM1_ESM.pdf [file 41598_2018_37761_MOESM1_ESM.pdf]

Victoria Huang, Anderson A. Butler, and Farah D. Lubin. Telencephalon transcriptome analysis of chronically stressed adult zebrafish.

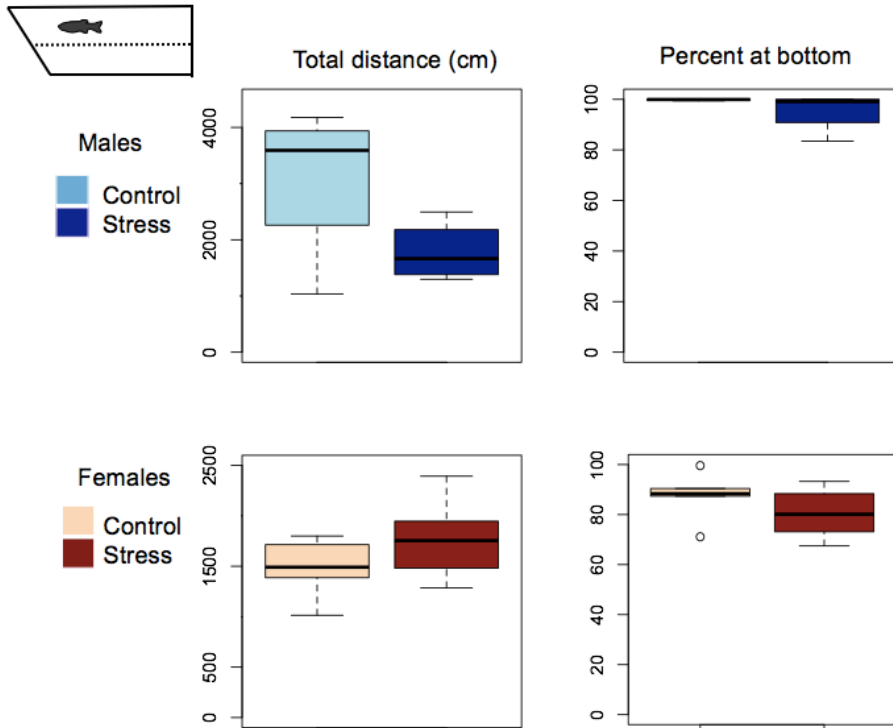

**Supplement 1. Novel tank swimming behavior.** Total swim distance and percent time at bottom in a novel tank were measured from males and females. Horizontal lines indicate the median. Vertical lines indicate 1.5 times the interquartile range. Open circles indicate values outside the interquartile range. Outliers were not included in analysis. Males: N=4 per group. Females: n=6

### Supplement 3. Reverse transcription qPCR primer characteristics

| Gene            | accession      | F and R primers 5' -3'                                                    | Amplicon length |
|-----------------|----------------|---------------------------------------------------------------------------|-----------------|
| <i>ache</i>     | NM_131846      | F GCAAAAGCATGTGGGCTTGA<br>R TCCACTTCCACTGTCGCTC                           | 147             |
| <i>nr3c1</i>    | NM_001020711   | F ACAGCTTCTTCCAGCCTCAG<br>R CCGGTGTTCTCCTGTTTGGAT<br>*Pavlidis et al 2015 | 116             |
| <i>hsd11b2</i>  | NM_212720      | F GCTCCTTTCTCCTCAACCCC<br>R GCTTTATAAGCGCACGAGGC                          | 155             |
| <i>npy</i>      | NM_131074      | F GGAGGAGCTCGCCAAGTAT<br>R GGGACTCTGTTTCACCAATCA<br>*Drew et al 2008      | 128             |
| <i>efla</i>     | NM_131263      | F CACCGTTCCAAAGGTTGCG<br>R TGGCAACAGGTGCAGTTCTAA                          | 224             |
| <i>lox12b</i>   | NM_001080626   | F TGTGAAATTTGCACTCGCAGC<br>R TTCAGGCTCCTGGTAGGCTAT                        | 156             |
| <i>cdk5</i>     | NM_131719      | F AGGCCTCCGGATGTACTGTT<br>R TCGTCCACATCGTTACCAGG                          | 128             |
| <i>chrna7</i>   | NM_201219      | F GCCGTACCCAGATGTGACTT<br>R GCAGGGCCAGAGTAGAGATG                          | 104             |
| <i>gpx1a</i>    | NM_001007281   | F ACGACCCTGTGTCCCTTAT<br>R CTTCTGCTGTACCTCTTGAATG<br>*Guan et al 2011     | 133             |
| <i>jun</i>      | NM_199987      | F CCGACGTGGGACTTCTCAA<br>R ATCCGTCACGTTCTTGGGAC                           | 125             |
| <i>igflbp2a</i> | NM_131458      | F GACCCTAAAGCACCATGC<br>R GAGATCCTTCCAGCACCTG<br>* Arslan-ergul 2014      | 71              |
| <i>acypl</i>    | NM_001122849   | F ACGAGCTGTTGTCTGTGGATT<br>R CGGTTCCAGCATCAGTGTTT                         | 129             |
| <i>col8a2</i>   | NM_001082901   | F TGCCAAGACATTCCCGAGAC<br>R AACTTCTGCAGGTCAGGTGG                          | 125             |
| <i>ela2l</i>    | NM_199886      | F GGTGTGGATGTGCGTCCTAA<br>R CAGTGAGCGGCAGTCAAAAC                          | 128             |
| <i>nog2</i>     | NM_130992      | F GCCTCACCTGAGCGAGTATC<br>R GCGCCACGTGCATAAATAG                           | 135             |
| <i>nubl</i>     | NM_001113580   | F CCCTACCTTACCTGGTGCTGG<br>R AGCACCGCATAATTGTCCAC                         | 85              |
| <i>hey1</i>     | NM_212561.1    | F CTGAGGATACGCGCTGCTAA<br>R GATGATCCCTCTGCGACGTT                          | 199             |
| <i>her6</i>     | NM_131079.2    | F TGAACCTCGGGACACTTCGTG<br>R GCACAGCTGCTTCTAGTGGA                         | 91              |
| <i>her4.2</i>   | NM_131090.4    | F AGCTTTCTGTCTCAGTGCCC<br>R GATGTGACTGTGGGCTGGAG                          | 171             |
| <i>her8.2</i>   | NM_001166166.1 | F GAGCAGTAGAGTTTCTGACCCT<br>R AAGCGGGATCCAAGGGTTTT                        | 138             |
